1  
2  
3  
4  
5  
6  
7  
8  
9  
10  
11  
12  
13  
14  
15  
16  
17  
18  
19  
20  
21  
22  
23

**Cell cycle-dependent recruitment of FtsN to the divisome in *Escherichia coli***

Jaana Männik<sup>a</sup>, Sebastien Pichoff<sup>b</sup>, Joe Lutkenhaus<sup>b#</sup>, Jaan Männik<sup>a#</sup>

<sup>a</sup>Department of Physics and Astronomy, University of Tennessee, Knoxville, Tennessee, USA

<sup>b</sup>Department of Microbiology, Molecular Genetics, and Immunology, University of Kansas  
Medical Center, Kansas City, Kansas

Running Head: FtsN recruitment in *E. coli*

# Address correspondence to Jaan Männik; JMannik@utk.edu

Joe Lutkenhaus; Jlutkenh@kumc.edu

24 **Abstract**

25 Cell division in *Escherichia coli* starts with the formation of an FtsZ protofilament network in the  
26 middle of the cell, the Z ring. However, only after a considerable lag period do the cells start to  
27 form a midcell constriction. The basis of this cell cycle checkpoint is yet unclear. The onset of  
28 constriction is dependent upon the arrival of so-called late divisome proteins, among which,  
29 FtsN is the last arriving essential one. The timing and dependency of FtsN arrival to the  
30 divisome, along with genetic evidence, suggests it triggers cell division. In this study, we used  
31 high throughput fluorescence microscopy to quantitatively determine the arrival of FtsN and  
32 the early divisome protein ZapA to midcell at a single-cell level during the cell cycle. Our data  
33 show that recruitment of FtsN coincides with the initiation of constriction within experimental  
34 uncertainties and that the relative fraction of ZapA/FtsZ reaches its highest value at this event.  
35 We also find that FtsN is recruited to midcell in two distinct temporal stages with septal  
36 peptidoglycan synthesis starting in the first stage and accelerating in the second stage, during  
37 which the amount of ZapA/FtsZ in the midcell decreases. In the presence of FtsA\*, recruitment  
38 of FtsN becomes concurrent with the formation of the Z-ring, but constriction is still delayed  
39 indicating FtsN recruitment is not rate limiting, at least under these conditions. Finally, our data  
40 support the recently proposed idea that ZapA/FtsZ and FtsN are part of physically separate  
41 complexes in midcell throughout the whole septation process.

42

43 **Importance**

44 In *E. coli*, FtsN has been considered a trigger for septal wall synthesis and the onset of  
45 constriction. While FtsN is critical for cell division, its recruitment kinetics to midcell has not  
46 been characterized. Using quantitative high throughput microscopy, we find that FtsN is  
47 recruited to midcell in two temporal stages. The septal cell wall synthesis starts at the first  
48 stage and accelerates in the second stage. In the presence of an FtsA mutant defective in self-  
49 interaction, recruitment of FtsN to midcell is enhanced, but constriction is still delayed. Our  
50 results shed new light on an essential but not rate-limiting role of FtsN in *E. coli* cell division and  
51 also support the view that ZapA/FtsZ and FtsN are part of physically separate complexes in  
52 midcell throughout the division process.

53

54

## 55 **Introduction**

56 Cell division in bacteria requires the regulated assembly of several dozen divisome proteins that  
57 collectively initiate and guide the formation of the constriction/septum, which divides the  
58 mother cell into two daughters (1, 2). In *Escherichia coli*, the assembly of the essential divisome  
59 proteins involves at least two stages (3, 4). During the first stage, the tubulin-like GTPase FtsZ  
60 polymerizes into dynamic protofilament assemblies (5) that are attached to the inner leaflet of  
61 the cytoplasmic membrane by the membrane tethers FtsA and ZipA (6). These assemblies are  
62 also decorated by the non-essential Z-ring associated protein, ZapA (3, 5, 7), and potentially  
63 with several less conserved and less abundant Zap proteins (ZapC, ZapD) (8-10). This initial  
64 complex forms a highly dynamic discontinuous ring-like structure, referred to as the Z-ring,  
65 composed of FtsZ protofilaments which treadmill around the division plane (11-13). FtsEX also  
66 arrives at this stage and is required for recruitment of proteins during the second stage (14, 15).  
67  
68 During the second stage, the remaining essential divisome proteins are recruited to midcell to  
69 complete the assembly of the mature divisome (1, 2), which then starts to synthesize the septal  
70 cell wall. Dependency studies indicate a sequential recruitment of these divisome proteins with  
71 the order FtsK<FtsQ<FtsB-FtsL<FtsW-FtsI<FtsN (1, 2). FtsN is the last of the essential proteins to  
72 arrive, and it has been postulated to be the trigger protein that leads to the onset of  
73 constriction (16-21). FtsN is an integral membrane protein (22), with a short cytoplasmic  
74 domain (FtsN<sup>cyto</sup>), a single transmembrane helix followed by a large periplasmic domain (23).  
75 The periplasmic domain is further divided into two subdomains: an essential domain (FtsN<sup>E</sup>),  
76 which has been implicated in triggering septal peptidoglycan (PG) synthesis (17, 24), and a C-

77 terminal SPOR (septal peptidoglycan binding) domain, which interacts with PG strands denuded  
78 of peptide linkages by amidases (16, 25, 26).

79

80 The recruitment of FtsN to midcell is complex, requiring FtsA, FtsQ, FtsI and likely all upstream  
81 proteins (1, 27, 28). It has been reported that a small amount of FtsN is recruited to the division  
82 site before the start of cell wall synthesis through a cytosolic interaction between FtsN<sup>cyto</sup> and  
83 FtsA at the Z-ring (29-32). This initial recruitment of FtsN, along with ZipA, is proposed to  
84 interact with the PG synthases PBP1a and PBP1b to initiate a pre-septal phase of PG synthesis  
85 (33). Once the constriction starts, more FtsN is recruited via its SPOR domain that binds to  
86 denuded glycan strands produced by activated amidases (16, 34). Since the denuded strands  
87 are formed following the onset of septal cell wall synthesis, the recruitment process of FtsN via  
88 its SPOR domain is thought to be self-enhancing (also referred to as the septal PG loop) once  
89 constriction starts (16, 22, 25).

90 Current models on how FtsN initiates the onset of constriction envision a two-pronged  
91 mechanism (17, 35-37). In this model FtsN<sup>E</sup> causes a conformational change in FtsQLB in the  
92 periplasm that activates FtsWI (36). A parallel activation pathway in the cytoplasm involves  
93 FtsN<sup>cyto</sup> activating FtsA (30-32). The FtsA mutant R286W, with reduced self-interaction, is  
94 thought to mimic an active state of FtsA and will be denoted here also as FtsA\*. FtsA\* acts  
95 directly on FtsW in the cytoplasm (38). Under physiological conditions these pathways  
96 synergize to activate FtsWI. However, mutations that hyperactivate either of the two pathways  
97 are capable of leading to cell constriction in the absence of the other (1, 17, 35).

98

99 While FtsN is essential for cell division and potentially a trigger for it, the kinetics of its  
100 recruitment to the divisome has not yet been determined. In particular, the question of  
101 whether FtsN recruitment is rate-limiting for the onset of constriction has not been addressed.  
102 All existing data on FtsN recruitment to the divisome originates from static cell studies or  
103 imaging studies where short time-lapse series have been taken. Here we study FtsN dynamics  
104 at the individual cell level throughout the cell cycle and determine its recruitment kinetics to  
105 the divisome. Our high-throughput studies show that while the recruitment of ZapA/FtsZ to  
106 midcell is gradual, recruitment of FtsN is abrupt and occurs on average about a quarter of the  
107 cell cycle after a persistent Z-ring forms. Within minutes of FtsN recruitment, if not faster, the  
108 onset of constriction starts indicating that the septal cell wall synthesis is tightly linked to the  
109 arrival of FtsN to midcell. In the presence of FtsA\*, FtsN arrives at midcell as the Z ring forms  
110 but constriction is not immediately initiated. Under these conditions FtsN arrival is not the rate-  
111 limiting component of the divisome that determines the timing of the onset of constriction. We  
112 also find that FtsZ protofilament condensation is not required for FtsN recruitment and the  
113 onset of constriction as has been proposed for *B. subtilis* (39, 40). However, a fraction of  
114 ZapA/FtsZ at the midcell in the ring plateaus at its peak value. Furthermore, our data show that  
115 the recruitment of FtsN to midcell occurs in two distinct stages. During both stages, cells  
116 constrict, but the speed of septal closure increases in the second stage, which starts when  
117 ZapA/FtsZ numbers at midcell start to decrease. Our data also lends strong support to the idea  
118 that FtsN and ZapA/FtsZ are part of spatially separate complexes throughout the division  
119 process.

120 **Results**

121

122 **FtsN accumulates rapidly at midcell about a quarter of the cell cycle time after the formation**  
123 **of a persistent midcell ZapA/Z-ring**

124 To investigate the recruitment kinetics of FtsN to the divisome in live cells, we used quantitative  
125 fluorescence microscopy of a functional N-terminal fusion of Ypet to FtsN (Ypet-FtsN) (41). We  
126 studied the kinetics of FtsN relative to the formation of the Z-ring. As a proxy for the Z ring, we  
127 used a functional C-terminal fusion of mCherry to ZapA (ZapA-mCherry) (34). ZapA is a highly  
128 conserved early cell division protein that binds to FtsZ, although not essential (42). We found  
129 that the ZapA fraction at midcell is precisely the same as the FtsZ fraction at midcell throughout  
130 the cell cycle (SI Fig. S1). The same partitioning ratio of FtsZ and ZapA at midcell indicates that  
131 they bind to each other at a fixed stoichiometric ratio irrespective of whether FtsZ  
132 protofilaments form transient assemblies or are part of a mature divisome that synthesizes  
133 septal PG. Altogether, these data show that ZapA-mCherry acts as a faithful reporter for FtsZ.  
134 We imaged cells in mother-machine microfluidic devices under moderately fast and slow  
135 growth conditions. Cells grew in these devices in steady-state conditions with doubling times of  
136  $Td = 78 \pm 28 \text{ min}(\text{mean} \pm SD)$  and  $Td = 143 \pm 45 \text{ min}$ , respectively. These doubling times  
137 and cell lengths were comparable to the parent strain without the Ypet-FtsN and ZapA-mCherry  
138 labels indicating the fluorescent tags did not affect cell parameters (SI Table S1). Note that all  
139 measurements were carried out at 28°C where the growth rate is expected to be about two  
140 times slower than at 37°C (43). At the single-cell level, the mid-cell accumulation of ZapA at the  
141 slow growth rate increased gradually as a function of cell cycle time (Fig. 1A,B, top), consistent

142 with the previous reports which monitored FtsZ (5, 44). The overall increase in the ZapA  
143 amount at midcell was interspersed by large fluctuations in ZapA numbers in the first half of the  
144 cell cycle, reflecting the appearance and disappearance of FtsZ transient assemblies (5). FtsN  
145 did not appear to participate in these transient assemblies, and its midcell accumulation  
146 occurred at later times of the cell cycle and showed a much more rapid increase (Fig. 1A,B,  
147 middle). The initial increase in the amount of FtsN at midcell was accompanied by an increase in  
148 the mid-cell phase signal (Fig. 1A,B, bottom), indicating that the onset of constriction started at  
149 about the time FtsN midcell recruitment as concluded before (16, 18, 20, 41). Thus, FtsN  
150 showed an abrupt accumulation at midcell compared to FtsZ and ZapA. Qualitatively similar  
151 behavior was also observed in moderately fast-growing cells (SI Fig. S2).

152 We then determined the timings of Z-ring formation ( $T_z$ ) and the onset of FtsN accumulation at  
153 midcell ( $T_n$ ) from time-lapse images (Fig. 1A) using an automated algorithm (Methods). We  
154 refer to time  $T_n$  as the time when an N-ring is first observed and  $T_z$  indicates the time when a  
155 persistent Z-ring forms, i.e. ZapA/FtsZ protofilament assemblies that are continuously present  
156 until shortly before cells separate when the Z-ring disassembles. There are some uncertainties  
157 in distinguishing persistent FtsZ assemblies from transient ones (5) in these time-lapse  
158 measurements. However, a fully automated and traceable approach allowed us to determine  
159 this timing consistently from measurement to measurement (Methods). The timings of  $T_n$  and  
160  $T_z$  were well-correlated with each other in both growth conditions (Fig. 2A,B) with a Pearson  
161 correlation  $R = 0.77$  for moderately fast and  $R = 0.84$  in slow-growth conditions. However, at  
162 least part of this correlation can be explained by the fact that FtsZ protofilament assembly is  
163 required to recruit FtsN. At the same time, there was a significant lag time from the onset of Z-



164 ring formation to the onset of FtsN recruitment (Fig. 2C,D). The average lag time (all averages  
165 will be denoted by  $\langle \rangle$ ) was about a quarter of the cell cycle time for both media conditions  
166 (Glucose-cas:  $\langle (T_n - T_z)/T_d \rangle = 27 \pm 17\%$ ; glycerol-TrE:  $27 \pm 15\%$ ) (SI Table S1). This long  
167 lag time shows that midcell formation of a persistent Z ring alone is not sufficient for the  
168 recruitment of FtsN.

169 **ZapA fraction at midcell reaches a maximum at the start of the FtsN recruitment to the**  
170 **divisome**

171 Why is the midcell recruitment of FtsN delayed by about a quarter of the cell cycle, and what  
172 event is needed for the recruitment of FtsN to occur? It has been argued that the onset of  
173 constriction in *B. subtilis* follows condensation of FtsZ protofilaments in the middle of the cell  
174 (40, 45). To test if a similar process also holds in *E. coli*, we determined the width of the Z-ring  
175 and the N-ring at the time of the onset of constriction ( $T_n$ ). The width reflects the spatial  
176 spread of FtsZ protofilaments along the long axis of the cell, however, the number reported is  
177 larger than the actual spread because of the width of the point-spread function (PSF) of the  
178 microscope. In both growth conditions, the width of midcell ZapA-mCherry accumulations  
179 started to decrease before the onset of constriction and continued to decrease throughout the  
180 constriction period (Fig. 3A,B). The width of the N-ring also decreased throughout the  
181 constriction period. Thus, there was no sharp condensation in the longitudinal distribution of  
182 ZapA/FtsZ before or at the onset of constriction, which is not consistent with an abrupt FtsZ  
183 protofilament condensation needed to trigger the onset of constriction.  
184 It has also been proposed earlier that FtsZ needs to accumulate to some threshold number at  
185 the Z-ring to initiate cell division (46). To test this idea further, we determined how the number

186 of ZapA molecules varied as a function of time at about time  $Tn$ . In slow-growth conditions, the  
187 number of ZapAs in the divisome increased linearly in time before  $Tn$  (Fig. 3C). At time  $Tn$ , the  
188 linear increase almost stopped, and the number of ZapA molecules stayed constant for about  
189 30 min (Fig. 3C). This behavior is consistent with the idea of a threshold accumulation of FtsZ.  
190 However, at a moderately fast growth rate, the number of ZapA molecules increased  
191 continuously throughout  $Tn$ , and their number peaked only about 20 min (0.25Td) after the  
192 onset of constriction (Fig. 3D). This further increase could have arisen from fluorophore  
193 maturation if the concentration of ZapA-mCherry had varied within the cell cycle, but we found  
194 this variation small (<10%).

195 We subsequently investigated how the fraction of ZapA at the midcell varies as a function of  
196 time in the vicinity of  $Tn$ . We found that the population-average fraction also increased about  
197 linearly after formation of a persistent Z-ring (Fig. 3E,F). At time  $Tn$ , the fraction stopped  
198 increasing in both growth conditions and plateaued at its highest value (43% in both growth  
199 conditions). So, the threshold accumulation of a relative *fraction* of ZapA holds in both growth  
200 conditions. The same behavior was also confirmed by plotting  $Tn$  vs this fraction and observing  
201 that these two quantities showed a zero correlation (SI Fig. S3). It is unclear why the fraction of  
202 ZapA should reach a threshold value rather than the total number of ZapA molecules in the  
203 divisome at the onset of constriction. Furthermore, the coefficient of variation for both the  
204 fraction of ZapA and the total number of ZapAs in the midcell Z-ring was about 0.3 (SI Fig. S3),  
205 indicating that if there is a threshold, then it is rather poorly defined in the cell population. An  
206 alternative explanation for plateauing is that at time  $Tn$  some change in the divisome prevents

207 a further increase in the FtsZ amount in the Z-ring. Rather than being a cause for the onset of  
208 constriction, the threshold accumulation may be a consequence of divisome maturation.

209 **Septal cell wall synthesis starts at the first distinct stage of the FtsN recruitment**

210 Our single-cell data (cf. Fig. 1B, middle) is indicative that the recruitment of FtsN occurs in two  
211 stages during the cell cycle, although single-cell signals show large fluctuations. This finding  
212 would support the idea that FtsN is first weakly recruited to the divisome via FtsA and later  
213 more strongly via its SPOR domain once septal PG synthesis starts (16, 30, 33). To investigate  
214 this idea further, we averaged the single-cell data over the cell population to remove the large  
215 fluctuations in protein numbers inherent to single-cell data. The population-averaged midcell  
216 accumulation of FtsN showed two distinct stages when plotted as a function of cell age (Fig.  
217 4A,B). The first rise in the FtsN midcell amount occurs at about the population-averaged time  
218  $\langle T_n \rangle$ , which is  $(0.48 \pm 0.11)Td$  in glucose-cas and  $(0.65 \pm 0.14)Td$  in glycerol-TrE  
219 measurements (*mean*  $\pm$  *SD*). Expectedly, the sharp increase observed in the single-cell data  
220 (cf. Fig. 1B middle) was smeared out because of the variability in  $T_n$  timing in the cell  
221 population. There was also a second distinct increase in FtsN accumulation in the population-  
222 averaged data. It started at about  $0.75Td$  for cells in the glucose-cas (Fig. 4A) and  $0.9Td$  for  
223 cells in the glycerol-TrE medium (Fig. 4B). This increase was accompanied by a *decrease* in the  
224 relative and absolute amount of ZapA/FtsZ in the Z-ring. An increase in the FtsN midcell  
225 numbers, while there was a decrease in the ZapA/FtsZ numbers, indicates FtsN is recruited  
226 independently of ZapA/FtsZ during this stage. Such recruitment may be due to binding of the  
227 FtsN SPOR domain to denuded glycan strands and not involving ZapA/FtsZ.

228 It is also worth mentioning that only a relatively small fraction of FtsN is recruited to the  
229 divisome even at its peak recruitment. At the peak during the 2nd stage, we found that the  
230 number of FtsN in the divisome was just 16% of the total number of FtsN molecules present in  
231 the cell in glycerol-TrE and 18% in glucose-cas medium (Fig. 4A,B; SI Fig. S4). In contrast, about  
232 45% of ZapA is recruited to the divisome at its peak recruitment. It is unclear what the function  
233 of the remaining 83% of the FtsN molecules, which appear to be uniformly distributed  
234 throughout the cell membrane. Of the 17% of the FtsN present at midcell at its peak, 70% were  
235 recruited during the first stage, while the remaining 30% were recruited at the second stage.  
236 Interestingly, these fractions were the same in both growth conditions. Moreover, if the  
237 recruitment kinetics are plotted as a function of (absolute) time instead of cell age (relative  
238 time), then the duration of the first and the second stages were effectively the same (SI Fig.  
239 S5A,B) despite the twofold difference in doubling times in these two growth conditions (SI  
240 Table S1). The latter finding is suggestive that septal PG synthesis is not limited by substrate  
241 availability, which is likely to vary in different growth conditions, but by enzyme kinetics.  
242 Next, we investigated how the two stages of FtsN recruitment are related to septal cell wall  
243 synthesis. We used two independent methods to assess the synthesis rate of the septal cell  
244 wall. In the first method, we followed the phase signal at midcell. The change in the latter is  
245 approximately proportional to the change in the amount of the dry biomass at the midcell (see  
246 Methods). As the septum starts to constrict, the dry biomass in the cell center decreases,  
247 leading to an increase of the phase signal in the negative phase contrast imaging that we used  
248 (cf. Fig. 1B, bottom). The increase in the phase signal approximately coincided with the onset of  
249 the first stage of the FtsN recruitment (within about  $\pm 3min$  glucose-Cas and  $\pm 8min$  in glycerol

250 medium) when we aligned phase signals of single cells relative to their  $T_n$  (Fig. 4C, D). As a  
251 second method, we determined the length growth rate of the cells. Here the length growth rate  
252 is defined as  $(1/L)(\Delta L/\Delta t)$  where  $\Delta L$  is the change of the cell length from a pole to a pole,  $L$ ,  
253 during small time interval  $\Delta t$ . This growth rate varies in a cell-cycle-dependent manner rather  
254 than being a constant as shown recently (47). The length growth rate also started to increase  
255 when the first FtsN accumulation occurred in the glycerol-TrE medium (SI Fig. 5E,G). In glucose-  
256 cas medium, the length growth rate may be delayed but not more than by about 0.1Td (SI Fig.  
257 5F,H). These two independent measurements thus show that septal PG synthesis starts already  
258 at the first stage of FtsN recruitment to the divisome.

259

## 260 **Upregulation of FtsA affects recruitment of ZapA/FtsZ and condensation of the Z-ring but not** 261 **the N-ring**

262 To further understand what role FtsA plays in the recruitment of FtsN and early divisome  
263 proteins, we introduced into our strain an extra copy of FtsA on plasmid pDSW210 (pSEB306+)  
264 under an isopropyl- $\beta$ -D-thiogalactoside (IPTG) inducible  $P_{trc}$  promoter (48, 49). This plasmid  
265 allows upregulation of the concentration of FtsA ([FtsA]) in the cell by about 50% (SI Fig. S6)  
266 under the experimental conditions used in this study. However, in slow growth conditions in  
267 glycerol medium, FtsA expression from this plasmid is too leaky (SI Fig. S6B), so we focus on the  
268 results from the moderately fast growth condition. In addition to the strain mentioned above,  
269 we constructed a reference strain expressing GFP instead of FtsA from pDSW210 in non-labeled  
270 WT background BW27783 cells. We imaged this reference strain (JM149) in the same  
271 microfluidic chip simultaneously with the above-described strain of interest (JM150). The total

272 fluorescence intensity of GFP in the reference strain allowed us to estimate the number of FtsA  
273 molecules synthesized from plasmid pSEB306+ before and after IPTG induction revealing that  
274 leakage from the plasmid accounted for less than 5% of the native protein level in uninduced  
275 conditions (Fig. 5A). The induced condition resulted in a 50% increase in the level of FtsA, which  
276 led to an increase in the cell length by about 10% (SI Table S1). This behavior is different from  
277 the high-level expression of FtsA that inhibits cell septation and causes the formation of  
278 filamentous cells (50-52).

279 The main effect observed after overexpression of FtsA was a significantly reduced amount of  
280 ZapA-mCherry at the divisome (Fig. 5B). However, in the first quarter of the cell cycle, the  
281 amount of ZapA-mCherry at midcell was not affected. During the first quarter, ZapA-mCherry is  
282 mostly part of transient FtsZ assemblies and other complexes that lack FtsN. In later parts of the  
283 cell cycle, the midcell ZapA fraction decreases from about 45% to 30% at its peak. At the same  
284 time, strikingly, the fraction of FtsN at midcell remained unaffected by FtsA upregulation  
285 throughout the cell cycle (Fig. 5C). Thus, the FtsA upregulation by 50% does not affect  
286 recruitment of FtsN to midcell, but it has a significant effect on ZapA/FtsZ recruitment.

287 We also investigated how the increased FtsA affected the condensation of the Z-ring. Based on  
288 *in vitro* measurements, FtsA has been suggested to act as an anti-bundling agent through  
289 forming minirings (53, 54). We, therefore, compared the changes in the width of both the Z-  
290 and N-rings before and after the onset of constriction ( $T_n$ ). Before FtsA induction, both the Z-  
291 and N-ring widths behaved similarly to the WT strain without the plasmid (Fig. 5D). However, in  
292 FtsA upregulated conditions, the distribution of FtsZ protofilaments along the long axes of the  
293 cell remained wide and did not condense. In contrast, the N-ring appeared similar to WT cells

294 (Fig. 5D). This finding indicates that FtsN and ZapA/FtsZ are present in spatially separated  
295 complexes. These conclusions agree with previous observations that proteins in the Z-ring were  
296 separated from proteins in the PG synthesizing machinery along the radial direction (19, 55,  
297 56). Here, our data show that separation can also occur along the cell's long axis, at least in FtsA  
298 upregulated conditions. Furthermore, the finding that the ZapA-mCherry (FtsZ)-ring stays broad  
299 and does not condense suggests that FtsA upregulation antagonizes FtsZ protofilament  
300 bundling. Strikingly, however, the recruitment of FtsN and the condensation of the N-ring were  
301 not affected. The latter finding suggests that the majority of FtsN is recruited to the divisome  
302 independent of ZapA/FtsZ.

### 303 **FtsA\* leads to earlier recruitment of FtsN but not to earlier constriction**

304 It has been proposed that FtsA self-interaction prevents recruitment of downstream proteins,  
305 including FtsN, to the divisome (31, 32, 57). The FtsA mutant R286W (FtsA\*) has a reduced  
306 ability to self-interact/polymerize but still interacts normally with FtsZ (57-59). To further  
307 understand how disruption of the FtsA self-interaction affects FtsN recruitment kinetics, we  
308 upregulated FtsA\* in the WT FtsA background. To that end, we replaced *ftsA* by *ftsA\** in  
309 plasmid pDSW210 (pSEB306+\*) and repeated experiments described in the previous section.  
310 We found that upregulation of FtsA\* by about 50% with respect to the native FtsA levels did  
311 not affect cell doubling times but led to about a 16% shortening of cell length (SI Table S1).  
312 Overexpression of FtsA\* decreased the midcell fraction of ZapA-mCherry slightly (Fig. 6A). The  
313 decrease of about 3% was uniform throughout the cell cycle in contrast to overexpression of  
314 FtsA, in which case the ZapA fraction in the beginning of the cell cycle was not affected but in  
315 the late stages decreased by about 15%. Furthermore, we found that the width of the midcell Z-

316 ring was not affected (SI Fig. S7A). At the same time, significantly more Ypet-FtsN was recruited  
317 at midcell following the overexpression of FtsA\* and it arrived at the same time as ZapA.  
318 Importantly, the fraction of FtsN at midcell was almost uniformly increased throughout the cell  
319 cycle (Fig. 6B). It was noticeable that the midcell fraction of FtsN in the FtsA\* upregulated  
320 conditions increased throughout the cell cycle in the same way as the midcell fraction of ZapA,  
321 although the latter was about twice higher (Fig. 6C,D). Unlike FtsA, FtsA\* is thus capable of  
322 recruiting FtsN to the divisome as soon as the Z-ring is assembled and in proportion to the  
323 fraction of ZapA/FtsZ in the Z-ring.

324 In addition to higher midcell abundance, FtsN recruitment also shifted earlier (from  $34 \pm$   
325  $18 \text{ min}$  to  $26 \pm 17 \text{ min}$ ; t-test  $p=4.1 \times 10^{-10}$ ), and the delay between recruitment of ZapA and  
326 FtsN to midcell shortened from  $20 \pm 12 \text{ min}$  without FtsA\* to  $9 \pm 8 \text{ min}$  in its presence (Fig.  
327 6E). The distribution of these delay times changed from one with a distinct lag time to an  
328 exponential, indicating that the presence of FtsA\* eliminates the lag. However, the earlier and  
329 more abundant recruitment of FtsN to the divisome did not lead to the earlier onset of  
330 constriction in these conditions (Fig. 6F, SI S7B). This result indicated that the recruitment of  
331 FtsN to the divisome is not a rate-limiting process for the onset of constriction under these  
332 conditions but reveals that FtsA\* accelerates FtsN recruitment.

333

## 334 **Discussion**

335 FtsN has been implicated as a trigger for the onset of constriction (16, 18, 20). Here we studied  
336 its recruitment kinetics to the divisome using an early cell division protein ZapA as a reference  
337 after verifying that the latter is a good proxy for FtsZ. Our data show that, unlike the gradual



338 increase of ZapA/FtsZ at midcell over about a quarter of the cell cycle, the recruitment of FtsN  
339 occurs abruptly over much shorter time scales and, on average, about a quarter of the cell cycle  
340 later than when the persistent Z-ring forms. The question then arises as to what is responsible  
341 for the delay in FtsN recruitment following formation of the Z-ring? A long delay between the  
342 formation of a persistent Z-ring ( $T_z$ ) at midcell and an abrupt accumulation of FtsN ( $T_n$ )  
343 suggests that there is some cell cycle checkpoint between the formation of a persistent Z-ring  
344 and the onset of constriction.

345 **Is the onset of constriction triggered by the change in FtsZ protofilament assembly at midcell?**

346 What could be responsible for the delay between  $T_z$  and  $T_n$ ? The putative mechanisms  
347 proposed for a checkpoint for  $T_n$  so far include the change in the polymerization state of FtsZ  
348 (46), its higher-order assembly (40, 45) or that of FtsA (31, 32) or simply recruitment of FtsN  
349 itself (17). To further investigate the idea that FtsZ dynamics drive the checkpoint, we followed  
350 the amount of ZapA/FtsZ and the effective width of the septal ring before and after the onset of  
351 constriction. Our data show that condensation of FtsZ protofilament assemblies started before  
352 the onset of constriction and continued well past it. Unlike *B. subtilis* cells (39, 40), we did not  
353 observe a change in FtsZ protofilament condensation at the onset of constriction. It is possible  
354 that the mechanism triggering the onset of constriction is different in these two organisms,  
355 although many of the essential divisome components are homologous to each other.

356 We also tested the hypothesis that the numbers of FtsZ molecules need to reach some  
357 threshold value at midcell to initiate the formation of a constriction (46). Our data show that  
358 ZapA/FtsZ reaches a broad maximum (plateau region) in slow growth conditions at the onset of  
359 constriction. However, in faster growth conditions, this maximum is reached later. On the other

360 hand, the fraction of ZapA/FtsZ at midcell (about 45%) plateaued at the onset of constriction in  
361 both growth conditions. It is unclear why a fraction of FtsZ at midcell could have any  
362 significance in initiating downstream biochemical processes. A more likely explanation is that  
363 the constant fraction of ZapA/FtsZ at midcell indicates that divisome has matured to a  
364 functional form for PG synthesis. This mature divisome appears to be in a quasi-equilibrium  
365 characterized by an equilibrium constant. As the cell synthesizes more ZapA/FtsZ, it is  
366 incorporated into a divisome in proportion to this equilibrium constant. The constant fraction  
367 thus may be the consequence of divisome maturation by some unrelated process rather than  
368 the cause, but further work is warranted to support this claim.

#### 369 **Recruitment of FtsN is not rate-limiting for the onset of constriction**

370 Our data shows that there is sufficient FtsN available at all cell cycle times, but only about 17%  
371 is present in the septal ring at its peak, which occurs in the late stages of cell division (0.1-  
372 0.15Td before division). The late recruitment of FtsN to the divisome is thus not because FtsN is  
373 not available. This assessment is also consistent with measurements where we expressed FtsA\*  
374 in addition to the native copy of FtsA. In these conditions, FtsN was recruited concurrently with  
375 the formation of the Z ring. The early recruitment of FtsN in this strain can be explained by an  
376 increased number of FtsA\* molecules with a free 1C domain to interact with FtsN since FtsA\* is  
377 defective in self-interaction, which would mask the 1C domain (57-59). Though FtsN is available  
378 early in the cell cycle in WT cells, its recruitment does not occur until a later stage of the cell  
379 cycle. This indicates that some other process holds back the maturation of the divisome and  
380 that recruitment of FtsN to the divisome is not a rate-limiting process for the onset of  
381 constriction. It is possible that instead of FtsN, the recruitment of one or more of FtsN's

382 interaction partners is rate-limiting. The potential interaction partners that could be rate-  
383 limiting for division are FtsQ (in complex with FtsBL) or FtsWI proteins (28, 60). It could also be  
384 that the rate-limiting step is a change in FtsA polymerization/self-interaction state or the  
385 activation of FtsW/I (57, 61). Although data show that the recruitment of FtsN is not rate-  
386 limiting for the onset of constriction, it does not contradict the notion that recruitment of FtsN  
387 is the essential last step that triggers activation of the divisome. Instead, our findings show that  
388 the recruitment of the FtsN is not instrumental in controlling the timing of the division process,  
389 as it should occur rapidly once the rate-limiting step is surmounted.

#### 390 **Decoupling of FtsN midcell accumulations from FtsZ protofilaments**

391 Our data (Fig. 5) show that after FtsA overexpression, the fraction of ZapA/FtsZ in the Z-ring  
392 decreased, and the rings did not condense at the onset of constriction as it did in WT cells. This  
393 mild effect of increased FtsA on Z ring morphology is consistent with the disassembly of Z rings  
394 that occurs when FtsA is increased 10-fold (50). What is surprising is that the N rings assembled  
395 normally. This finding can be explained if FtsN in the septal ring is not physically linked to FtsZ  
396 protofilaments. Evidence for decoupling FtsN and FtsZ protofilaments has also been  
397 documented in other measurements where their localization in the radial direction was  
398 examined (55) and from recent single-molecule studies (62).

399 Beyond ZapA/FtsZ and FtsN being part of different complexes, the data on Fig. 5 furthermore  
400 could imply that FtsA has a minor role in directly recruiting FtsN to the septal ring. Otherwise,  
401 upregulation of FtsA would have either up or downregulated the FtsN fraction in the midcell as  
402 it did for the ZapA/FtsZ fraction and as it occurred when FtsA\* was upregulated. However, this  
403 interpretation might be too simplistic because it assumes that FtsA forms similar polymeric or

404 higher-order structures when associated with FtsZ protofilaments and in separate divisome  
405 complexes together with FtsN. If this is not the case, then the two different higher-order  
406 structures could respond differently to increasing FtsA concentration. When in complex with  
407 FtsZ protofilaments, FtsA could form 12 member minirings as observed in *in vitro* measurements  
408 (53, 54, 63), which appear to prevent the condensation of FtsZ protofilaments. As such, FtsA  
409 acts as an anti-bundling agent for FtsZ protofilaments, which is consistent with findings in Fig. 5  
410 that upregulation of FtsA leads to more diffuse Z-rings and a lower fraction of ZapA/FtsZ in  
411 these rings. The concentration of the minirings should have a sensitive dependence on the total  
412 FtsA monomer concentration with a high Hill coefficient ( $\sim 12$ ). As a result, small variations in  
413 FtsA concentration could significantly affect FtsZ protofilament assemblies observed in our  
414 experiments.

415 A different scenario might materialize in divisome complexes containing FtsN. FtsN and  
416 potentially other divisome proteins can be expected to bind to FtsA via its 1C interface (29, 57,  
417 64, 65). In support of his assumption, when FtsA\* is present, FtsN is rapidly recruited to the Z  
418 ring overcoming the normal delay observed when only WT FtsA is present. The 1C domain is  
419 also involved in forming a monomer-monomer interface in FtsA polymers (66). Because of the  
420 dual role of this interface, FtsA cannot form minirings when it is already a part of the divisome  
421 complex as the latter prevents the closure of the ring. Thus, active divisome complexes should  
422 only include linear FtsA polymers. The length of these polymers could be rather short because  
423 linear polymers should be less stable than the ring ones. Furthermore, the length distribution of  
424 linear polymers can be expected to have a weaker dependence on the total FtsA monomer

425 concentration. A weaker dependence would be consistent with the experimental observation  
426 that FtsN concentration at midcell does not change upon upregulation of FtsA (Fig. 5C).  
427 So far, there is no experimental data on the polymerization state of FtsA in either of the  
428 complexes. It remains even a possibility that divisome complexes with FtsN do not contain any  
429 FtsA. Furthermore, the FtsA minirings have not been observed *in vivo*, and it remains unclear  
430 how the minirings could keep up with treadmilling FtsZ protofilaments. Further measurements  
431 are warranted to understand what is the polymerization state of FtsA in different complexes *in*  
432 *vivo*.

### 433 **Two different stages in septal peptidoglycan synthesis**

434 Our data reveal two distinct stages in FtsN recruitment to midcell, both involving septal PG  
435 synthesis. We observed that the first FtsN recruitment/accumulation stage coincides with the  
436 onset of the constriction/ septal PG synthesis within about  $\pm 4$  min in glucose-cas and  $\pm 8$  min in  
437 glycerol medium (Fig. 1A; 4C-D). This may imply that the arrival of FtsN results in rapid  
438 activation of septal PG synthesis, although based on the time-resolution of our measurements,  
439 it is also possible that initial septal PG synthesis starts first and FtsN is recruited thereafter. In  
440 the former scenario, FtsN could be recruited first via its binding to FtsA (29, 30, 32). However, in  
441 this case, there is no extended period when FtsN lingers in the divisome just due to its sole  
442 binding to FtsA because once septal PG synthesis starts, FtsN can bind to denuded  
443 peptidoglycan strands also via its SPOR domain. This is presumably stronger binding than the  
444 binding of FtsN to FtsA, but the latter is not negligible because cells without the FtsN cytoplasmic  
445 domain or the FtsN D5N mutants show a division defect and elongated phenotype (31, 32).

446 The second distinctive stage of FtsN accumulation occurs late in the cell cycle (15 min before  
447 division in both growth conditions corresponding to 0.81Td and 0.90Td for glucose-cas and  
448 glycerol conditions, respectively). There seems to be some additional mechanism involved in  
449 this stage, in addition to the SPOR-domain related self-enhanced recruitment of FtsN.  
450 Interestingly, the start of the second stage of FtsN recruitment occurs approximately when the  
451 amount of ZapA/FtsZ in the septal ring starts to decrease. While this could be a mere  
452 coincidence, it appears that FtsZ protofilament-involved complexes may sequester away some  
453 of the FtsN binding partners such as FtsQLB from the divisome complexes. Once FtsZ  
454 protofilaments at midcell become unstable, perhaps because of high membrane curvature at  
455 the site of constriction, fewer FtsQLB complexes are associated with FtsZ protofilaments, and  
456 more can be directly recruited by the divisome complexes. As the elevated level of FtsN at the  
457 septal ring coincides with the increase in septal cell wall synthesis (SI Fig. S5, C-F), the rate of  
458 the septal cell wall synthesis increases in this second stage (SI Fig. S5 C-D). At the very end of  
459 the division process, this synthesis proceeds without any FtsZ protofilaments present at the  
460 division site. It is likely that FtsN and, to a lesser degree DedA, which also features a SPOR  
461 domain (67), completely take over the role of positioning the divisome apparatus from FtsZ  
462 protofilaments.

463 The two phases of FtsN accumulation may also correspond to the septation stages recently  
464 observed in TEM images of dividing *E. coli* (68). The images showed a V-shaped invagination in  
465 the early stages of septation, referred to as the constriction phase. This invagination developed  
466 an inward protrusion similar to the septum of *B. subtilis* in the second stage, referred to as the  
467 septation phase. Although the authors did not determine the exact timing of these phases in

468 the cell cycle, their approximate durations appear similar to stages one and two observed here  
469 for FtsN recruitment.

470

471 In conclusion, our data show an abrupt accumulation of FtsN to the divisome, which occurs  
472 about 30% of cell cycle time after a persistent Z-ring forms. This accumulation coincides with  
473 the onset of septal cell wall synthesis within the uncertainties of our measurements. We did not  
474 observe a change in FtsZ protofilament condensation at the start of constriction but did  
475 observe that the fraction of FtsZ in the ring reached a plateau. Furthermore, our data support  
476 the idea (55, 62) that FtsN is not part of the complexes that include FtsZ protofilaments but  
477 resides in separate divisome complexes involved in septal PG synthesis. Finally, our data show  
478 that the recruitment of FtsN to midcell is not rate-limiting for the onset of constriction, even  
479 though this recruitment step is the last essential step for the onset of constriction.

480

## 481 **Experimental procedures**

### 482 **Media, bacterial strains, and plasmids**

483 Cells were grown with M9 minimal media (Teknova Inc., CA) supplemented with 0.5% glucose  
484 (Millipore Sigma, MO) and 0.2% casamino acids (cas, ACROS Organics) or 0.3% glycerol  
485 (ThermoFisher Scientific) and trace metals mixture (TrE, Teknova Inc., CA) at 28°C. Unless  
486 indicated otherwise, antibiotic concentrations were as follows: Ampicillin (Amp), 100 µg/mL;  
487 Chloramphenicol (Cm), 25 µg/mL; Kanamycin (Kan), 25 µg/mL). For induction, 100µM of IPTG  
488 was used. All *E. coli* strains used in the reported experiments are derivatives of K12 BW27783  
489 obtained from the Yale Coli Genetic Stock Center (CGSC#: 12119). The strain with fluorescent

490 fusions of ZapA-mCherry and Ypet-FtsN (JM144) was made by P1 transduction (69). All strains  
491 and plasmids used in this study are listed in SI Tables S2A and S2B, respectively.

492

493 Further details for cell preparation and culture in microfluidic devices, fluorescence microscopy,  
494 image analysis and Western blot analysis can be found in SI Text.

495

#### 496 **Acknowledgments**

497 The authors thank Ariel Amir and Sriram Tiruvadi Krishnan for useful discussions, Da Yang and  
498 Scott Retterer for help in microfluidic chip making, and Thomas Bernhardt and Jie Xiao for  
499 bacterial strains. A part of this research was conducted at the Center for Nanophase Materials  
500 Sciences, which is sponsored at Oak Ridge National Laboratory by the Scientific User Facilities  
501 Division, Office of Basic Energy Sciences, U.S. Department of Energy. This work was supported  
502 by the US-Israel BSF research grant 2017004 (JM), by the National Institutes of Health awards  
503 GM127413 (JM) and GM29764 (JL).

504

#### 505 **Conflict of interest**

506 The authors declare that they have no conflicts of interest with the contents of this article.

507

508

509



## 510 References

- 511 1. Du S, Lutkenhaus J. 2017. Assembly and activation of the *Escherichia coli* divisome.  
512 Molecular Microbiology 105:177-187.
- 513 2. Haeusser DP, Margolin W. 2016. Splitsville: structural and functional insights into the  
514 dynamic bacterial Z ring. Nature Reviews Microbiology 14:305-319.
- 515 3. Aarsman MEG, Piette A, Fraipont C, Vinkenvleugel TMF, Nguyen-Disteche M, den  
516 Blaauwen T. 2005. Maturation of the *Escherichia coli* divisome occurs in two steps.  
517 Molecular Microbiology 55:1631-1645.
- 518 4. de Boer PAJ. 2010. Advances in understanding *E. coli* cell fission. Current Opinion in  
519 Microbiology 13:730-737.
- 520 5. Walker BE, Männik J, Männik J. 2020. Transient membrane-linked FtsZ assemblies  
521 precede Z-ring formation in *Escherichia coli*. Current Biology 30:499-508.
- 522 6. Pichoff S, Lutkenhaus J. 2002. Unique and overlapping roles for ZipA and FtsA in septal  
523 ring assembly in *Escherichia coli*. Embo Journal 21:685-693.
- 524 7. Caldas P, Lopez-Pelegrin M, Pearce DJG, Budanur NB, Brugues J, Loose M. 2019.  
525 Cooperative ordering of treadmilling filaments in cytoskeletal networks of FtsZ and its  
526 crosslinker ZapA. Nature Communications 10:5744.
- 527 8. Hale CA, Shiomi D, Liu B, Bernhardt TG, Margolin W, Niki H, de Boer PAJ. 2011.  
528 Identification of *Escherichia coli* ZapC (YcbW) as a component of the division apparatus  
529 that binds and bundles FtsZ polymers. Journal of Bacteriology 193:1393-1404.
- 530 9. Durand-Heredia J, Rivkin E, Fan GX, Morales J, Janakiraman A. 2012. Identification of  
531 ZapD as a cell division factor that promotes the assembly of FtsZ in *Escherichia coli*.  
532 Journal of Bacteriology 194:3189-3198.
- 533 10. Durand-Heredia JM, Yu HH, De Carlo S, Lesser CF, Janakiraman A. 2011. Identification  
534 and characterization of ZapC, a stabilizer of the FtsZ ring in *Escherichia coli*. Journal of  
535 Bacteriology 193:1405-1413.
- 536 11. Bisson AW, Hsu YP, Squyres GR, Kuru E, Wu FB, Jukes C, Sun YJ, Dekker C, Holden S,  
537 VanNieuwenhze MS, Brun YV, Garner EC. 2017. Treadmilling by FtsZ filaments drives  
538 peptidoglycan synthesis and bacterial cell division. Science 355:739-743.
- 539 12. McQuillen R, Xiao J. 2020. Insights into the structure, function, and dynamics of the  
540 bacterial cytokinetic FtsZ-ring, p 309-341. In Dill KA (ed), Annual Review of Biophysics,  
541 vol 49.

- 542 13. Yang XX, Lyu ZX, Miguel A, McQuillen R, Huang KC, Xiao J. 2017. GTPase activity-coupled  
543 treadmilling of the bacterial tubulin FtsZ organizes septal cell wall synthesis. *Science*  
544 355:744-747.
- 545 14. Du S, Henke W, Pichoff S, Lutkenhaus J. 2019. How FtsEX localizes to the Z ring and  
546 interacts with FtsA to regulate cell division. *Molecular Microbiology* 112:881-895.
- 547 15. Pichoff S, Du S, Lutkenhaus J. 2019. Roles of FtsEX in cell division. *Research in*  
548 *Microbiology* 170:374-380.
- 549 16. Gerding MA, Liu B, Bendezu FO, Hale CA, Bernhardt TG, de Boer PA. 2009. Self-enhanced  
550 accumulation of FtsN at division sites and roles for other proteins with a SPOR domain  
551 (DamX, DedD, and RlpA) in *Escherichia coli* cell constriction. *J Bacteriol* 191:7383-401.
- 552 17. Liu B, Persons L, Lee L, de Boer PAJ. 2015. Roles for both FtsA and the FtsBLQ  
553 subcomplex in FtsN-stimulated cell constriction in *Escherichia coli*. *Molecular*  
554 *microbiology* 95:945-70.
- 555 18. Weiss DS. 2015. Last but not least: new insights into how FtsN triggers constriction  
556 during *Escherichia coli* cell division. *Molecular Microbiology* 95:903-909.
- 557 19. Yang X, McQuillen R, Lyu Z, Phillips-Mason P, De La Cruz A, McCausland JW, Liang H,  
558 DeMeester KE, Santiago CC, Grimes CL, de Boer P, Xiao J. 2021. A two-track model for  
559 the spatiotemporal coordination of bacterial septal cell wall synthesis revealed by  
560 single-molecule imaging of FtsW. *Nat Microbiol* 6:584-593.
- 561 20. Lutkenhaus J. 2009. FtsN-trigger for septation. *J Bacteriol* 191:7381-2.
- 562 21. Daley DO, Skoglund U, Soderstrom B. 2016. FtsZ does not initiate membrane  
563 constriction at the onset of division. *Scientific Reports* 6:33138.
- 564 22. Ursinus A, van den Ent F, Brechtel S, de Pedro M, Holtje JV, Lowe J, Vollmer W. 2004.  
565 Murein (peptidoglycan) binding property of the essential cell division protein FtsN from  
566 *Escherichia coli*. *J Bacteriol* 186:6728-37.
- 567 23. Dai K, Xu Y, Lutkenhaus J. 1996. Topological characterization of the essential *Escherichia*  
568 *coli* cell division protein FtsN. *J Bacteriol* 178:1328-34.
- 569 24. Boes A, Kerff F, Herman R, Touze T, Breukink E, Terrak M. 2020. The bacterial cell  
570 division protein fragment (E)FtsN binds to and activates the major peptidoglycan  
571 synthase PBP1b. *J Biol Chem* 295:18256-18265.
- 572 25. Yahashiri A, Jorgenson MA, Weiss DS. 2015. Bacterial SPOR domains are recruited to  
573 septal peptidoglycan by binding to glycan strands that lack stem peptides. *Proc Natl*  
574 *Acad Sci U S A* 112:11347-52.

- 575 26. Alcorlo M, Dik DA, De Benedetti S, Mahasenani KV, Lee M, Dominguez-Gil T, Hesk D,  
576 Lastochkin E, Lopez D, Boggess B, Mobashery S, Hermoso JA. 2019. Structural basis of  
577 denuded glycan recognition by SPOR domains in bacterial cell division. *Nat Commun*  
578 10:5567.
- 579 27. Addinall SG, Cao C, Lutkenhaus J. 1997. FtsN, a late recruit to the septum in *Escherichia*  
580 *coli*. *Molecular Microbiology* 25:303-309.
- 581 28. Goehring NW, Gonzalez MD, Beckwith J. 2006. Premature targeting of cell division  
582 proteins to midcell reveals hierarchies of protein interactions involved in divisome  
583 assembly. *Mol Microbiol* 61:33-45.
- 584 29. Busiek KK, Eraso JM, Wang Y, Margolin W. 2012. The early divisome protein FtsA  
585 interacts directly through its 1c subdomain with the cytoplasmic domain of the late  
586 divisome protein FtsN. *J Bacteriol* 194:1989-2000.
- 587 30. Busiek KK, Margolin W. 2014. A role for FtsA in SPOR-independent localization of the  
588 essential *Escherichia coli* cell division protein FtsN. *Molecular Microbiology* 92:1212-  
589 1226.
- 590 31. Pichoff S, Du SS, Lutkenhaus J. 2018. Disruption of divisome assembly rescued by FtsN-  
591 FtsA interaction in *Escherichia coli*. *Proceedings of the National Academy of Sciences of*  
592 *the United States of America* 115:E6855-E6862.
- 593 32. Pichoff S, Du SS, Lutkenhaus J. 2015. The bypass of ZipA by overexpression of FtsN  
594 requires a previously unknown conserved FtsN motif essential for FtsA-FtsN interaction  
595 supporting a model in which FtsA monomers recruit late cell division proteins to the Z  
596 ring. *Molecular Microbiology* 95:971-987.
- 597 33. Pazos M, Peters K, Casanova M, Palacios P, VanNieuwenhze M, Breukink E, Vicente M,  
598 Vollmer W. 2018. Z-ring membrane anchors associate with cell wall synthases to initiate  
599 bacterial cell division. *Nat Commun* 9:5090.
- 600 34. Peters NT, Dinh T, Bernhardt TG. 2011. A fail-safe mechanism in the septal ring assembly  
601 pathway generated by the sequential recruitment of cell separation amidases and their  
602 activators. *J Bacteriol* 193:4973-83.
- 603 35. Li Y, Gong H, Zhan R, Ouyang S, Park KT, Lutkenhaus J, Du S. 2021. Genetic analysis of  
604 the septal peptidoglycan synthase FtsWI complex supports a conserved activation  
605 mechanism for SEDS-bPBP complexes. *PLoS Genet* 17:e1009366.
- 606 36. Marmont LS, Bernhardt TG. 2020. A conserved subcomplex within the bacterial  
607 cytokinetic ring activates cell wall synthesis by the FtsW-FtsI synthase. *Proceedings of*  
608 *the National Academy of Sciences of the United States of America* 117:23879-23885.

- 609 37. Taguchi A, Welsh MA, Marmont LS, Lee W, Sjodt M, Kruse AC, Kahne D, Bernhardt TG,  
610 Walker S. 2019. FtsW is a peptidoglycan polymerase that is functional only in complex  
611 with its cognate penicillin-binding protein. *Nature Microbiology* 4:587-594.
- 612 38. Park KT, Pichoff S, Du S, Lutkenhaus J. 2021. FtsA acts through FtsW to promote cell wall  
613 synthesis during cell division in *Escherichia coli*. *Proc Natl Acad Sci U S A* 118:  
614 e2107210118
- 615 39. McCausland JW, Yang XX, Squyres GR, Lyu ZX, Bruce KE, Lamanna MM, Soderstrom B,  
616 Garner EC, Winkler ME, Xiao J, Liu J. 2021. Treadmilling FtsZ polymers drive the  
617 directional movement of sPG-synthesis enzymes via a Brownian ratchet mechanism.  
618 *Nature Communications* 12: 609.
- 619 40. Whitley KD, Jukes C, Tregidgo N, Karinou E, Almada P, Cesbron Y, Henriques R, Dekker C,  
620 Holden S. 2021. FtsZ treadmilling is essential for Z-ring condensation and septal  
621 constriction initiation in *Bacillus subtilis* cell division. *Nature Communications* 12:2448.
- 622 41. Tiruvadi-Krishnan S, Männik J, Kar P, Lin J, Amir A, Männik J. 2021. Replication-related  
623 control over cell division in *Escherichia coli* is growth-rate dependent. *bioRxiv*  
624 doi:10.1101/2021.02.18.431686.
- 625 42. Gueiros-Filho FJ, Losick R. 2002. A widely conserved bacterial cell division protein that  
626 promotes assembly of the tubulin-like protein FtsZ. *Genes Dev* 16:2544-56.
- 627 43. Herendeen SL, Vanbogelen RA, Neidhardt FC. 1979. Levels of major proteins of  
628 *Escherichia coli* during growth at different temperatures. *Journal of Bacteriology*  
629 139:185-194.
- 630 44. Männik J, Walker BE, Männik J. 2018. Cell cycle-dependent regulation of FtsZ in  
631 *Escherichia coli* in slow growth conditions. *Molecular Microbiology* 110:1030-1044.
- 632 45. Squyres GR, Holmes MJ, Barger SR, Pennycook BR, Ryan J, Yan VT, Garner EC. 2021.  
633 Single-molecule imaging reveals that Z-ring condensation is essential for cell division in  
634 *Bacillus subtilis*. *Nature Microbiology* 6:553.
- 635 46. Si FW, Le Treut G, Sauls JT, Vadia S, Levin PA, Jun S. 2019. Mechanistic origin of cell-size  
636 control and homeostasis in bacteria. *Current Biology* 29:1-11.
- 637 47. Kar P, Tiruvadi-Krishnan S, Männik J, Männik J, Amir A. 2021. Distinguishing different  
638 modes of growth using single-cell data. *eLife* 10:e72565.
- 639 48. Pichoff S, Lutkenhaus J. 2005. Tethering the Z ring to the membrane through a  
640 conserved membrane targeting sequence in FtsA. *Molecular Microbiology* 55:1722-  
641 1734.

- 642 49. Weiss DS, Chen JC, Ghigo JM, Boyd D, Beckwith J. 1999. Localization of FtsI (PBP3) to the  
643 septal ring requires its membrane anchor, the Z ring, FtsA, FtsQ, and FtsL. *Journal of*  
644 *Bacteriology* 181:508-520.
- 645 50. Dai K, Lutkenhaus J. 1992. The proper ratio of FtsZ to FtsA is required for cell-division to  
646 occur in *Escherichia coli*. *Journal of Bacteriology* 174:6145-6151.
- 647 51. Dewar SJ, Begg KJ, Donachie WD. 1992. Inhibition of cell-division initiation by an  
648 imbalance in the ratio of FtsA to FtsZ. *Journal of Bacteriology* 174:6314-6316.
- 649 52. Ma X, Ehrhardt DW, Margolin W. 1996. Colocalization of cell division proteins FtsZ and  
650 FtsA to cytoskeletal structures in living *Escherichia coli* cells by using green fluorescent  
651 protein. *Proc Natl Acad Sci U S A* 93:12998-3003.
- 652 53. Krupka M, Margolin W. 2018. Unite to divide: oligomerization of tubulin and actin  
653 homologs regulates initiation of bacterial cell division. *F1000Res* 7:235.
- 654 54. Krupka M, Rowlett VW, Morado D, Vitrac H, Schoenemann K, Liu J, Margolin W. 2017.  
655 *Escherichia coli* FtsA forms lipid-bound minirings that antagonize lateral interactions  
656 between FtsZ protofilaments. *Nature Communications* 8:1-12.
- 657 55. Soderstrom B, Chan H, Shilling PJ, Skoglund U, Daley DO. 2018. Spatial separation of FtsZ  
658 and FtsN during cell division. *Molecular Microbiology* 107:387-401.
- 659 56. Soderstrom B, Mirzadeh K, Toddo S, von Heijne G, Skoglund U, Daley DO. 2016.  
660 Coordinated disassembly of the divisome complex in *Escherichia coli*. *Molecular*  
661 *Microbiology* 101:425-438.
- 662 57. Pichoff S, Shen B, Sullivan B, Lutkenhaus J. 2012. FtsA mutants impaired for self-  
663 interaction bypass ZipA suggesting a model in which FtsA's self-interaction competes  
664 with its ability to recruit downstream division proteins. *Molecular Microbiology* 83:151-  
665 167.
- 666 58. Geissler B, Elraheb D, Margolin W. 2003. A gain-of-function mutation in *ftsA* bypasses  
667 the requirement for the essential cell division gene *zipA* in *Escherichia coli*. *Proceedings*  
668 *of the National Academy of Sciences of the United States of America* 100:4197-4202.
- 669 59. Geissler B, Shiomi D, Margolin W. 2007. The *ftsA\** gain-of-function allele of *Escherichia*  
670 *coli* and its effects on the stability and dynamics of the Z ring. *Microbiology-Sgm*  
671 153:814-825.
- 672 60. Goehring NW, Beckwith J. 2005. Diverse paths to midcell: assembly of the bacterial cell  
673 division machinery. *Curr Biol* 15:R514-26.

- 674 61. Du S, Pichoff S, Lutkenhaus J. 2016. FtsEX acts on FtsA to regulate divisome assembly  
675 and activity. *Proceedings of the National Academy of Sciences of the United States of*  
676 *America* 113:E5052-E5061.
- 677 62. Lyu Z, Yahashiri A, Yang X, McCausland JW, Kaus GM, McQuillen R, Weiss DS, Xiao J.  
678 2021. FtsN activates septal cell wall synthesis by forming a processive complex with the  
679 septum-specific peptidoglycan synthase in *E. coli*. bioRxiv.  
680 doi:10.1101/2021.08.23.457437
- 681 63. Schoenemann KM, Krupka M, Rowlett VW, Distelhorst SL, Hu B, Margolin W. 2018. Gain-  
682 of-function variants of FtsA form diverse oligomeric structures on lipids and enhance  
683 FtsZ protofilament bundling. *Mol Microbiol* 109:676-693.
- 684 64. Rico AI, Garcia-Ovalle M, Mingorance J, Vicente M. 2004. Role of two essential domains  
685 of *Escherichia coli* FtsA in localization and progression of the division ring. *Mol Microbiol*  
686 53:1359-71.
- 687 65. Corbin BD, Geissler B, Sadasivam M, Margolin W. 2004. Z-ring-independent interaction  
688 between a subdomain of FtsA and late septation proteins as revealed by a polar  
689 recruitment assay. *J Bacteriol* 186:7736-44.
- 690 66. Szwedziak P, Wang Q, Freund SM, Lowe J. 2012. FtsA forms actin-like protofilaments.  
691 *EMBO J* 31:2249-60.
- 692 67. Liu B, Hale CA, Persons L, Phillips-Mason PJ, de Boer PAJ. 2019. Roles of the DedD  
693 protein in *Escherichia coli* cell constriction. *Journal of Bacteriology* 201.
- 694 68. Navarro PP, Vettiger A, Ananda VY, Llopis PM, Allolio C, Bernhardt TG, Chao LH. 2021.  
695 Cell wall synthesis and remodeling dynamics determine bacterial division site  
696 architecture and cell shape. bioRxiv. doi:10.1101/2021.10.02.462887.
- 697 69. Thomason LC, Costantino N, Court DL. 2007. *E. coli* genome manipulation by P1  
698 transduction. *Current Protocols in Molecular Biology* 79:1.17.1-1.17.8.
- 699

700 **Figures**

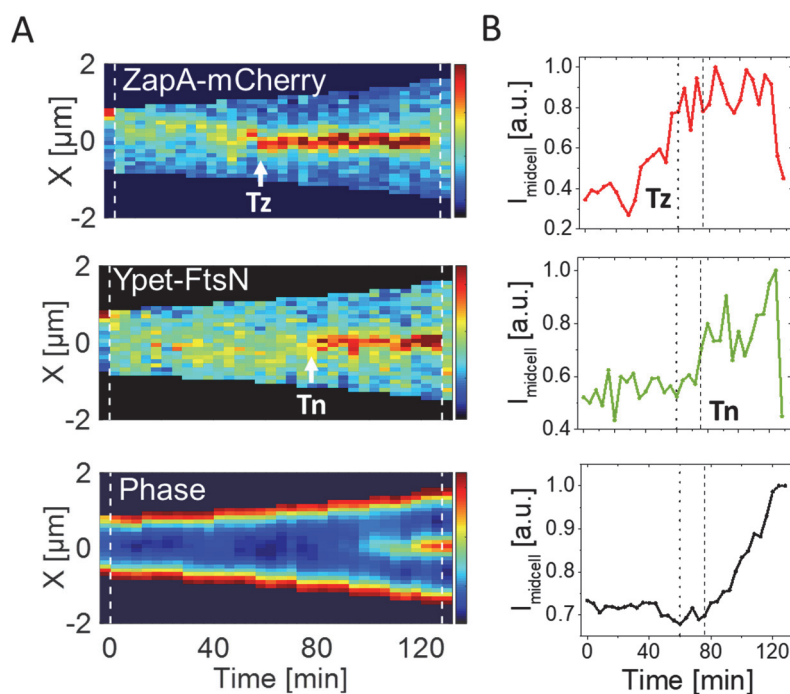

701

702

703 **Fig.1 Accumulation of ZapA and FtsN at midcell at the single cell level.**

704 **(A)** Kymographs of fluorescent and phase signals for a representative cell grown in M9 glycerol-  
705 TrE medium. Red corresponds to high and blue to low-intensity values. Black marks regions  
706 outside the cell. Dashed vertical lines indicate cell division events. The arrows indicate event  
707 timings as determined by an automated algorithm (see Methods). The timing of the persistent  
708 Z-ring is denoted by  $Tz$  and the onset of FtsN recruitment by  $Tn$ .

709 **(B)** Midcell intensity traces of ZapA-mCherry (top), Ypet-FtsN (middle), and phase signal (bottom)  
710 for the cell shown in the kymograph. The intensity traces were collected from about a 0.5  $\mu$ m  
711 wide band in the cell middle. The dotted line corresponds to  $Tz$  and the dashed line to  $Tn$  in all  
712 panels. "a.u." stands for an arbitrary unit. Note that the increase in the phase signal starts at  $Tn$ .

713



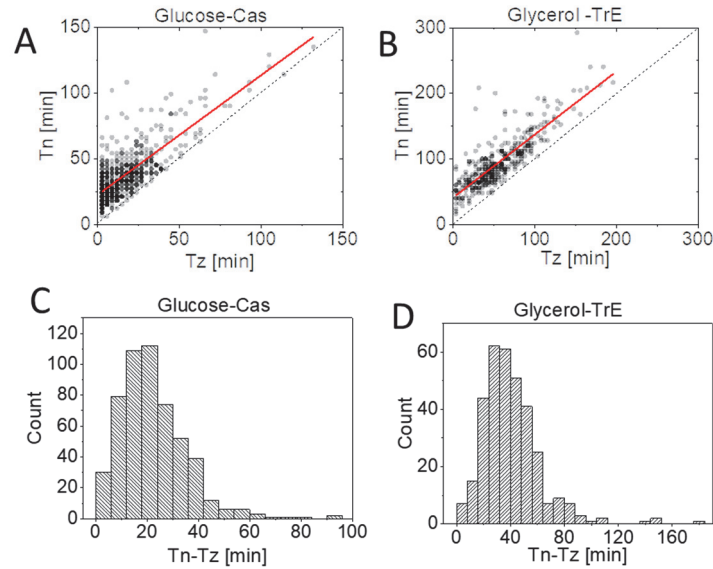

714

715

716 **Figure 2. The time delay between the FtsZ-ring/ZapA and N-ring formation.**

717 **A-B** Timing of the formation of a persistent Z-ring,  $T_z$ , versus timing for midcell accumulation of  
718 FtsN,  $T_n$ , for cells grown in M9 minimal media supplemented with **(A)** glucose-cas (N=526) and  
719 **(B)** glycerol-TrE (N=339). The solid red lines are the linear fit to the data ( $T_n = (0.91 \pm$   
720  $0.03)T_z + (22 \pm 0.8min), R = 0.77$ ) for glucose-cas and  $T_n = 0.96 \pm 0.03T_z + (41 \pm$   
721  $2.2min), R = 0.84$ ) for glycerol-TrE cells. The dashed black line corresponds to  $T_n = T_z$ .

722 **C-D** Distributions of time delays between the Z-ring and N-ring formation ( $T_n - T_z$ ) for cells  
723 grown in **(C)** glucose-cas media ( $21 \pm 13min; mean \pm SD$ ) and **(D)** in glycerol-TrE media ( $39 \pm$   
724  $22min; mean \pm SD$ ).

725



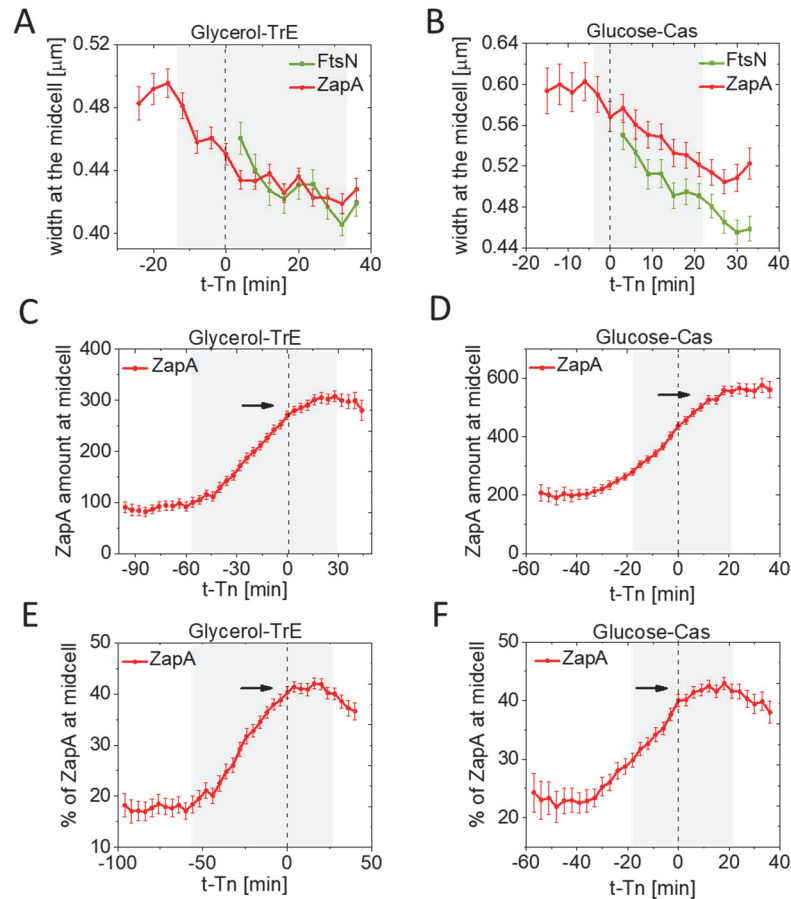

726

727

728 **Fig. 3. Kinetics of ZapA accumulation at the time of FtsN recruitment at midcell.**

729 **A-B** The spatial spread of ZapA-mCherry and Ypet-FtsN accumulations at midcell along the long  
730 axes of a cell as a function of time. Time zero corresponds to  $T_n$  (indicated by a dashed vertical  
731 line). **(A)** Slow-growing cells in glycerol-TrE media (N=339) and **(B)** moderately fast-growing cells  
732 in glucose-cas media (N=526). The shaded area marks the region where the number of cells  
733 analyzed is no less than 10% of its maximal value. All error bars represent 95% confidence  
734 intervals.

735 **C-D** Fluorescent intensity of ZapA-mCherry at midcell (1.0  $\mu\text{m}$  wide band) as a function of time  
736 from FtsN recruitment at midcell for **(C)** slow-growing and **(D)** moderately fast-growing cells. The  
737 fluorescent intensity reflects the number of ZapA present at the midcell. The arrow points to a  
738 plateau region.

739 **E-F** The percentage (fraction) of ZapA at midcell (1.0  $\mu\text{m}$  wide band) as a function of time from  
740 FtsN recruitment at midcell for **(E)** slow-growing and **(F)** moderately fast-growing cells. The arrow  
741 points to a plateau region.

742

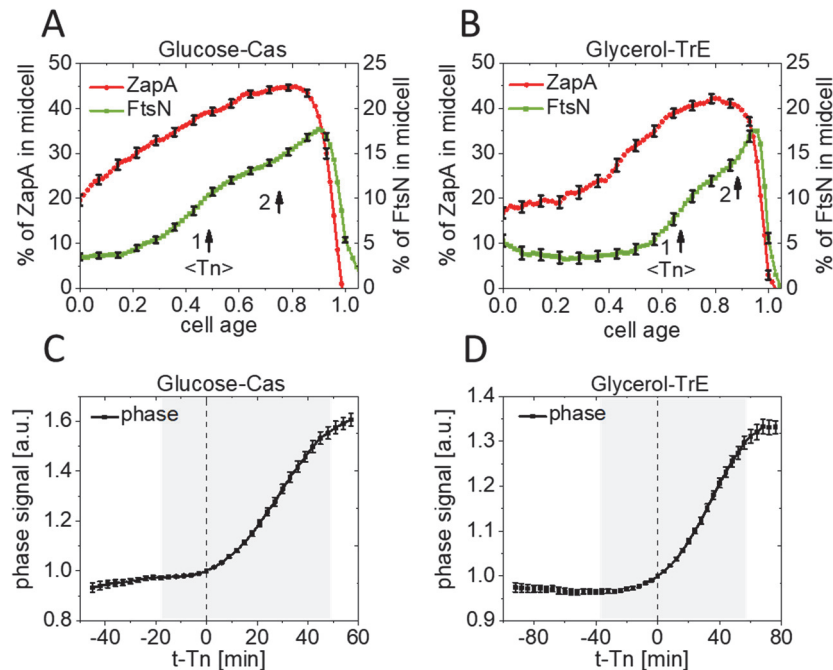

743

744 **Fig. 4. Septal cell wall synthesis starts at the first distinct stage of FtsN recruitment.**

745 **A-B** The percentage/fraction of ZapA-mCherry (left axis) and Ypet-FtsN (right axis) at midcell (1.0  
746  $\mu\text{m}$  wide band) as a function of cell age for **(A)** moderately fast-growing (glucose-cas media,  
747  $N=526$ ), and **(B)** slow-growing cells (glycerol media,  $N=339$ ). Arrows show the approximate start  
748 of stages 1 and 2. The start time for stage 1 is  $\langle T_n \rangle$  which is based on data in Fig. 2 and Table  
749 S1. The error bars represent 95% confidence intervals (for clarity, only every 5th point is shown).

750 **B-C** Phase signal intensity at midcell (1.0  $\mu\text{m}$  wide band) as a function of time from FtsN  
751 recruitment at midcell for **(C)** moderately fast-growing and **(D)** slow-growing cells. Time zero  
752 corresponds to  $T_n$  (indicated by a dashed vertical line). The shaded area marks the region where  
753 the number of cells analyzed is no less than 10% of its maximal value. All error bars correspond  
754 to 95% confidence intervals.

755

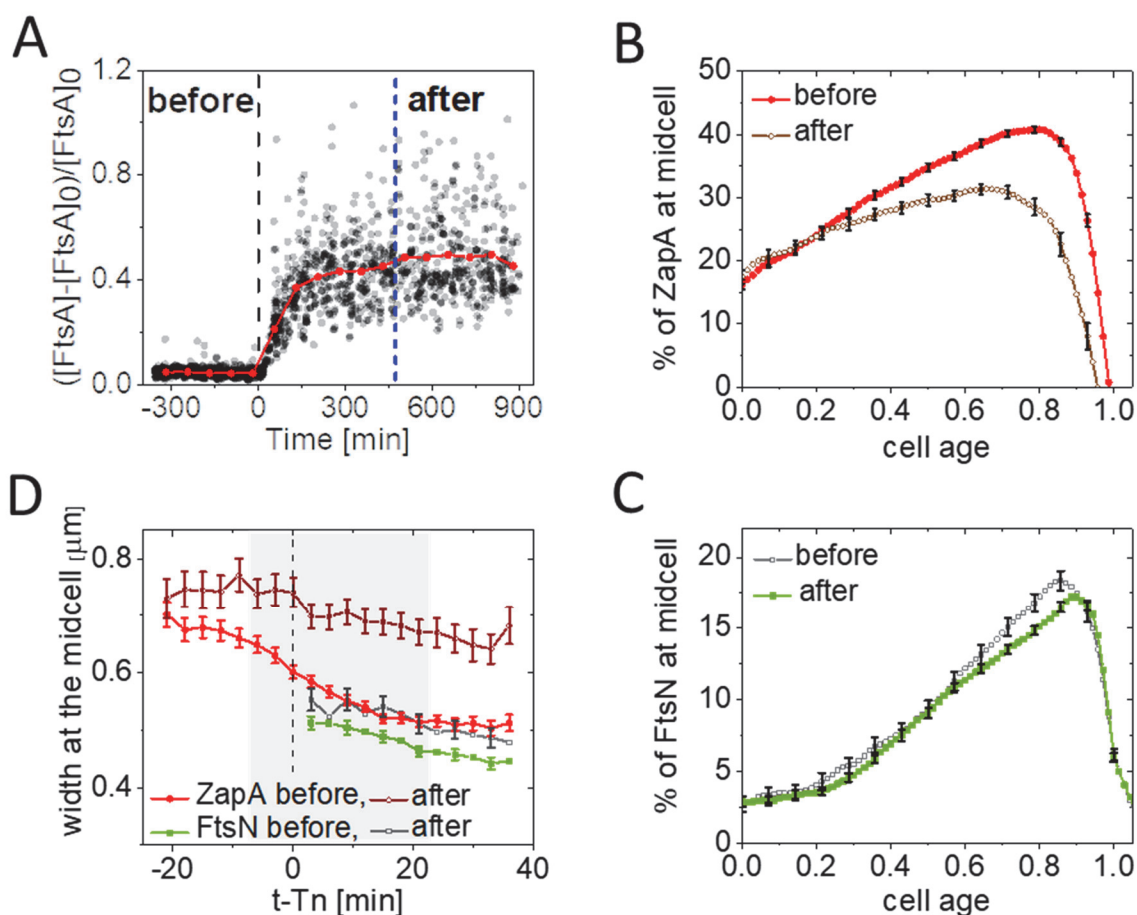

756

757

758 **Fig. 5. Changes in FtsN and ZapA midcell accumulations upon FtsA overexpression.**

759 **(A)** A relative increase in the concentration of FtsA, [FtsA], at cell birth before and after  
 760 induction with 100 $\mu\text{M}$  of IPTG as inferred from monitoring GFP reporter expressed from  
 761 pDSW210 (strain JM149). The shown increase is relative to WT FtsA concentration, [FtsA]<sub>0</sub>,  
 762 which is determined by Western blotting. Time zero (black dashed vertical line) corresponds  
 763 to the start of the induction. N=1470.

764 **(B)** The percentage (fraction) of ZapA-mCherry at midcell before and after overexpression of  
 765 FtsA as a function of cell cycle time. For cells termed "after," ZapA amounts were analyzed  
 766 when the cell growth reached a new steady-state (indicated by a blue vertical dashed line in  
 767 panel A). Cells were grown in M9 glucose-cas media at 28°C. The error bars represent 95%

768 confidence intervals (for clarity, only every 5th point is shown). N=660 (before); N=223  
769 (after).

770 **(C)** The percentage of Ypet-FtsN at midcell before and after overexpression of FtsA as a  
771 function of cell cycle time. Conditions as above for ZapA-mCherry in (B).

772 **(D)** The spatial spread of ZapA-mCherry and Ypet-FtsN accumulations at midcell along the long  
773 axes of cell as a function of time before and after overexpression of FtsA. Midcell traces of  
774 ZapA-mCherry and Ypet-FtsN were aligned at the time of FtsN recruitment at midcell,  $t -$   
775  $Tn = 0$ , marked by a dashed line. The shaded area marks the region where the number of  
776 cells analyzed does not vary more than 10%. The error bars represent 95% confidence  
777 intervals (for clarity, only every 2nd point is shown for FtsN).

778

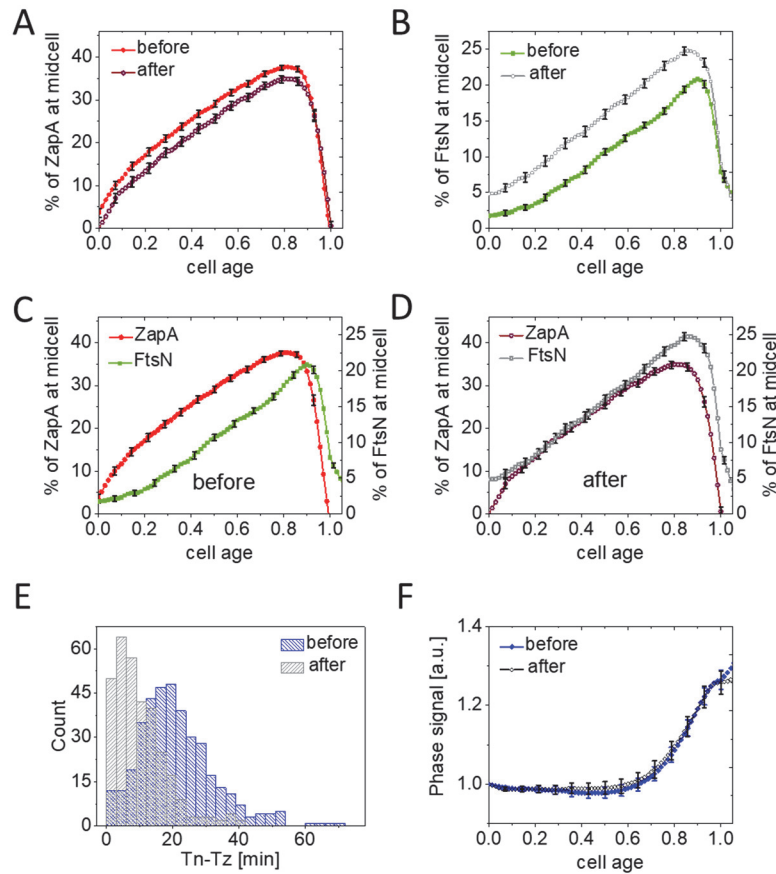

779

780

781 **Fig. 6. Changes in FtsN and ZapA midcell accumulations upon FtsA\* (FtsA<sup>R286W</sup>) overexpression.**

782 **(A)** The percentage (fraction) of ZapA-mCherry at midcell before and after overexpression of FtsA\*  
 783 (R286W) as a function of cell cycle time. FtsA\* was expressed as an extra copy from a plasmid  
 784 pSEB306+\* by the addition of 100 $\mu$ M IPTG in M9 glucose-cas media at 28°C. For cells termed "after,"  
 785 ZapA amounts were analyzed when the cell growth reached to a new steady-state. All error bars  
 786 represent 95% confidence intervals (for clarity, only every 5th point is shown). N=381 (before); N=321  
 787 (after)

788 **(B)** The percentage of Ypet-FtsN at midcell before and after overexpression of FtsA\* as a function of cell  
 789 cycle time. Conditions as above for ZapA-mCherry in (A).

790 **(C)-(D)** The percentage of ZapA-mCherry and Ypet-FtsN at midcell before and after upregulation of  
 791 FtsA\*, respectively.

792 **(E)** The distributions of time delay between the Z-ring and N-ring formation ( $T_n - T_z$ ) in cells before  
 793 ( $20 \pm 12$ ; *mean*  $\pm$  *SD*) and after ( $9 \pm 8$ ; *mean*  $\pm$  *SD*) upregulation of FtsA\*.

794 **(F)** Phase signal intensity at midcell (1.0  $\mu\text{m}$  wide band) as a function of cell age before and after  
795 upregulation of FtsA\*.
